# Supplementary material for: Design of a Quantitative LC-MS Method for Residual Toxins Adenylate Cyclase Toxin (ACT), Dermonecrotic Toxin (DNT) and Tracheal Cytotoxin (TCT) in Bordetella pertussis Vaccines
Source: MDPI journal article supplement (doi:10.3390/toxins13110763), 2021-10-28
Supplement: s1 [file s1]

# Supplementary Materials: Design of a Quantitative LC-MS Method for Residual Toxins Adenylate Cyclase Toxin (ACT), Dermonecrotic Toxin (DNT) and Tracheal Cytotoxin (TCT) in *Bordetella pertussis* Vaccines

Lisa Szymkowicz, Jeffery Gerard, Benjamin Messham, Wai Wan Vivian Tam and D. Andrew James

**Supplement S1.** Ph. Eur. 1356 Limits for Residual Toxins ACT, DNT and TCT per dose of acellular Pertussis vaccine.

| Toxin                   | Abbreviation | Molecule Type | Theoretical Molecular Weight | EU Limit per Dose | Limit in Moles per Dose |
|-------------------------|--------------|---------------|------------------------------|-------------------|-------------------------|
| Adenylate Cyclase Toxin | ACT          | Protein       | 177 414 g/mol                | 500 ng            | 2.8 pmol                |
| Dermonecrotic Toxin     | DNT          | Protein       | 160 644 g/mol                | Absence           | Not Defined             |
| Tracheal Cytotoxin      | TCT          | Glycopeptide  | 921 g/mol                    | 1.84 ng           | 2.0 pmol                |

**Supplement S2.** Concatenated (QconCAT) protein construct containing ACT and DNT peptide sequences flanked by six flanking residues from the endogenous protein sequences and a C-terminal poly-histidine tag. Surrogate peptides with matching AQUA peptides denoted with underline. The QconCAT construct was expressed as a native recombinant protein in *E. coli* and purified using a C-terminal His-tag as per the described protocol in Scott *et al.* [1].

MGSSGTTSNVLRNIENAVGSARDDVLIGTELADRITGDAQA  
 NVLRGAGGADAHWGQRALQGAQAVAAQRLVHAIAGRDTIR  
 INAGADQLWFARQGNDLEREVRKASALGVDYYDNVRNVEN  
 VIDEMPRKLDWEIAKFHLAATWIVPFYREIFFSTQDRSYR  
 VDVWRSVLKELPALIGASGLRLSRSLLEYVKARYEIIYYLLN  
 RVPHPLAIPAPMRNDDLVSIAATYDRAVIAYLKVRHYKVL  
 SQPGLIARGIENHNRLQEVRAYIGDLSPVNDVLYRAGYDLD  
 IAYLGKDVPGGGSTRITRHDEPVPIRRLLVAGFVSATTVGGR  
 NQAFLR...HHHHHH

ACT  
DNT

**Supplement S3.** Tune and inlet settings for the LC-MRM method on a Water Acquity H-class analytical UPLC and Xevo™ TQ-S mass spectrometer. Mobile phases consist of 0.1% FA in Water (i.e. line C) and 0.1% FA in ACN (i.e. line D).

ES+ Source | Fluidics | Diagnostics

Source Fitted: ESI:1

Voltages

Capillary (kV): 3.12 | 3.00

Cone (V): 123 | 30

Source Offset (V): 50

Temperatures

Desolvation Temp (°C): 600 | 600

Gas Flow

Desolvation (L/Hr): 993 | 1000

Cone (L/Hr): 155 | 150

Nebuliser (Bar): 5.6 | 7.0

Analysers

LM Resolution 1: 3.00

HM Resolution 1: 15.00

Ion Energy 1: 0.2

LM Resolution 2: 3.00

HM Resolution 2: 15.00

Ion Energy 2: 0.9

Collision Gas Flow (mL/Min): 0.14 | 0.15

Collision: 30

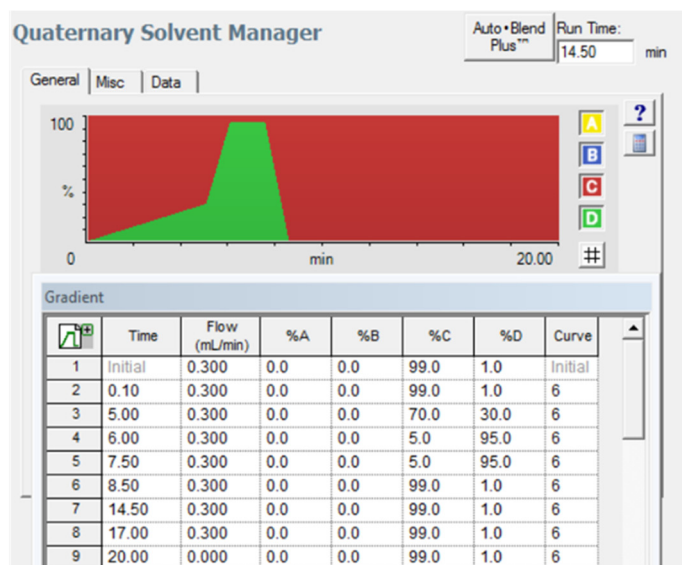

Sample Manager FTN

Run Time: 14.50 min

General | Data | Dilution | Events

Solvents

Wash Solvent Name: ACN/H2O (60:40 : v/v)

Purge Solvent Name: 10% Methanol

Pre-Inject Wash: 1 sec

Post-Inject Wash: 6 sec

Temperature Control

Column: 55.0 °C Alarm Band: ±5.0 °C

Sample: 8.0 °C ±2.0 °C

Loop Offline: ☐

Automatic min

Load Ahead: ☐

Active Preheater: Use Console Configuration

**Supplement S4.** Triple sawtooth LC gradient for column cleaning between samples. Mobile phases consist of 0.1% FA in Water (i.e., line C) and 0.1% FA in ACN (i.e., line D).

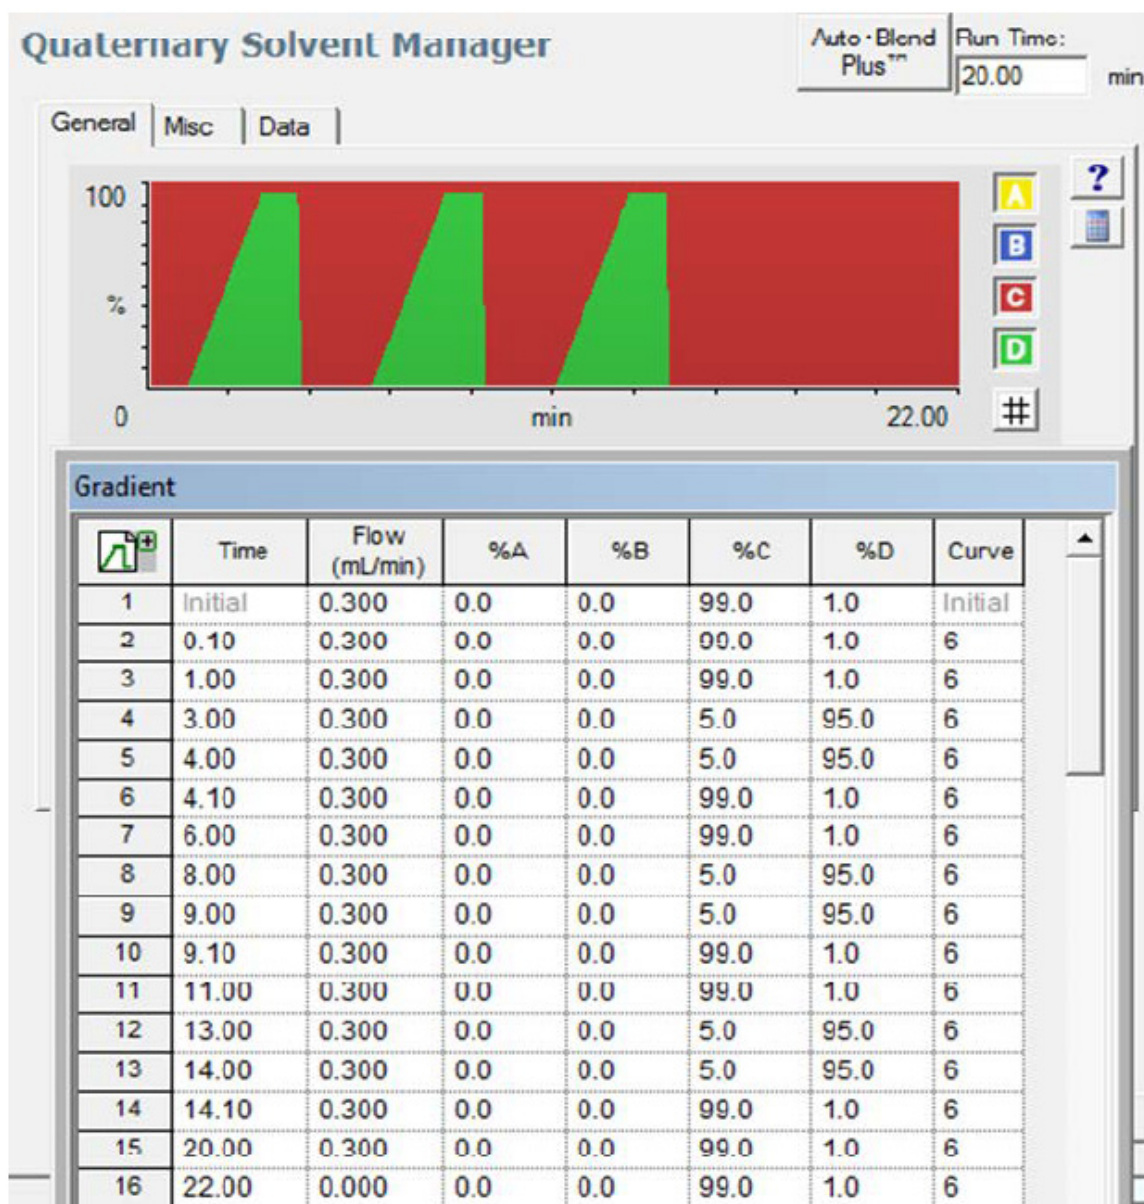

**Supplement S5.** Optimized MS method for multiple reaction monitoring (MRM) analysis of ACT, DNT and TCT analysis on the Xevo™ TQ-S.

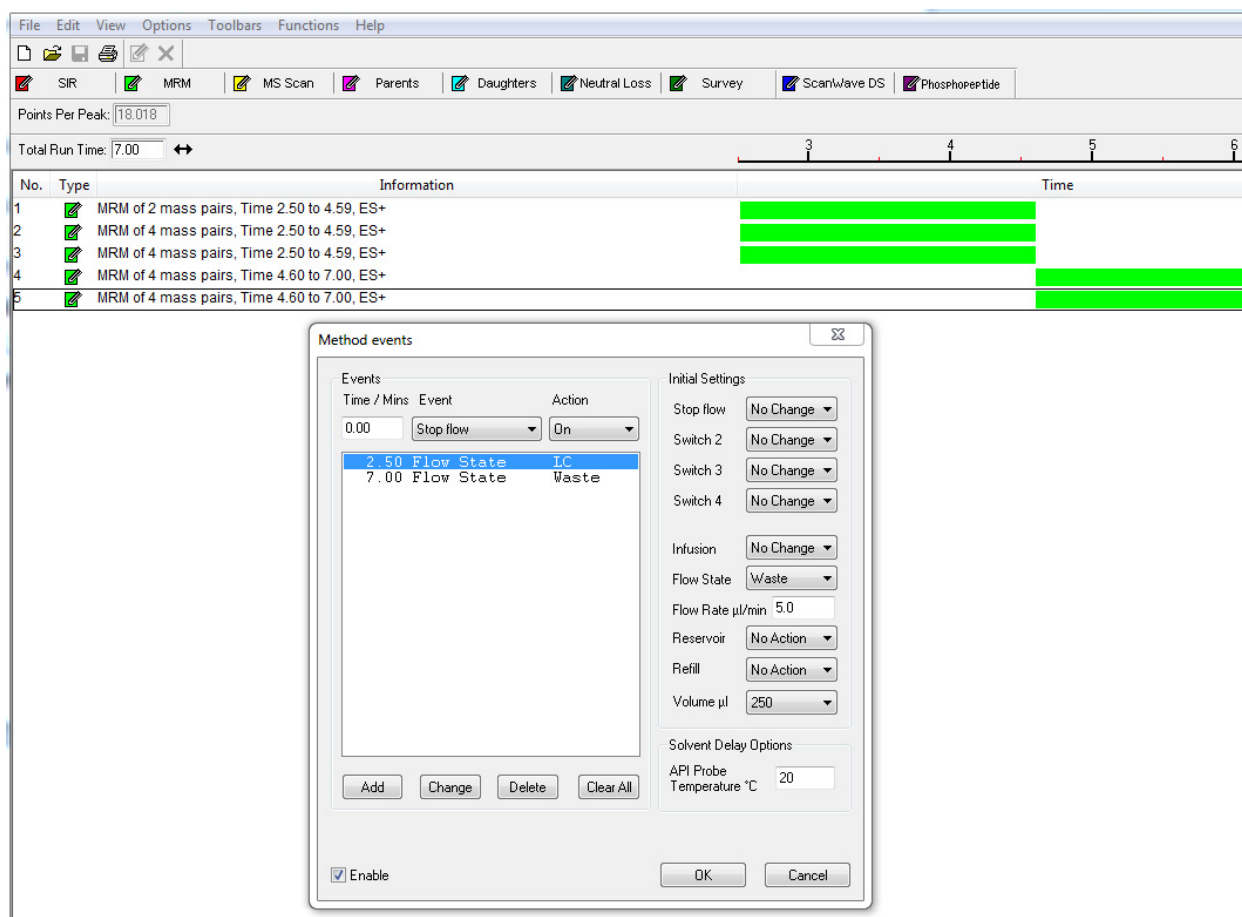

| MRM Function | Peptide             | Fragment       | Transition | Description | Precursor (m/z) | Fragment (m/z) | Cone (V) | Collision Energy (V) |
|--------------|---------------------|----------------|------------|-------------|-----------------|----------------|----------|----------------------|
| 1            | TCT                 | Loss of GlcNAc | 1          | TCT         | 922.3888        | 719.3099       | 35       | 31                   |
|              |                     |                |            |             | 461.6985        | 719.3099       | 35       | 11                   |
| 2            | NIENAVGSAR (ACT)    | y8             | 1          | Native      | 515.7674        | 803.4006       | 35       | 19                   |
|              |                     |                |            | Heavy AQUA  | 520.7716        | 813.4089       | 35       | 19                   |
|              |                     | y7             | 2          | Native      | 515.7674        | 674.3580       | 35       | 22                   |
|              |                     |                |            | Heavy AQUA  | 520.7716        | 684.3663       | 35       | 22                   |
| 3            | ITGDAQANVLR (ACT)   | y9             | 1          | Native      | 579.3173        | 943.4956       | 35       | 22                   |
|              |                     |                |            | Heavy AQUA  | 584.3214        | 953.5038       | 35       | 22                   |
|              |                     | y5             | 2          | Native      | 579.3173        | 572.3515       | 35       | 22                   |
|              |                     |                |            | Heavy AQUA  | 584.3214        | 582.3597       | 35       | 22                   |
| 4            | ELPALIGASGLR (DNT)  | y6             | 1          | Native      | 598.8535        | 560.3151       | 35       | 21                   |
|              |                     |                |            | Heavy AQUA  | 603.8576        | 570.3234       | 35       | 21                   |
|              |                     | y7             | 2          | Native      | 598.8535        | 673.3991       | 35       | 24                   |
|              |                     |                |            | Heavy AQUA  | 603.8576        | 683.4074       | 35       | 24                   |
| 5            | NDDLVSIAATYDR (DNT) | y8             | 1          | Native      | 726.8519        | 896.4472       | 35       | 24                   |
|              |                     |                |            | Heavy AQUA  | 731.8560        | 906.4555       | 35       | 24                   |
|              |                     | b3             | 2          | Native      | 726.8519        | 345.1041       | 35       | 29                   |
|              |                     |                |            | Heavy AQUA  | 731.8560        | 345.1041       | 35       | 29                   |

**Supplement S6.** TCT fragment ions from high-energy collision induced dissociation (HCD) on a Q-Exactive HF Orbitrap mass spectrometer.

| Precursor (m/z) | Fragment (m/z)               | Description                                                                                                | Ion Type  | Chemical Formula                                                               |
|-----------------|------------------------------|------------------------------------------------------------------------------------------------------------|-----------|--------------------------------------------------------------------------------|
| 922.3893 (+)    | 922.3853                     | Intact TCT molecular ion [M+H] <sup>+</sup>                                                                | Precursor | [C <sub>37</sub> H <sub>60</sub> O <sub>20</sub> N <sub>7</sub> ] <sup>+</sup> |
|                 | 719.3073                     | Loss of GlcNAc                                                                                             | Peptide   | [C <sub>29</sub> H <sub>47</sub> O <sub>15</sub> N <sub>6</sub> ] <sup>+</sup> |
|                 | 701.2969                     | Product from loss of GlcNAc + oxygen                                                                       | Peptide   | [C <sub>29</sub> H <sub>47</sub> O <sub>14</sub> N <sub>6</sub> ] <sup>+</sup> |
|                 | 534.2393                     | Product of glycan cleavage (loss of 1-6-anhydro sugar GlcNAc + MurNAc)                                     | Peptide   | [C <sub>21</sub> H <sub>36</sub> O <sub>11</sub> N <sub>5</sub> ] <sup>+</sup> |
|                 | 516.2292                     | Product of glycan cleavage                                                                                 | Peptide   | [C <sub>21</sub> H <sub>34</sub> O <sub>10</sub> N <sub>5</sub> ] <sup>+</sup> |
|                 | 445.1918                     | Peptide fragment                                                                                           | Peptide   | [C <sub>18</sub> H <sub>29</sub> O <sub>9</sub> N <sub>4</sub> ] <sup>+</sup>  |
|                 | 391.1813                     | Peptide fragment (y-ion)                                                                                   | Peptide   | [C <sub>15</sub> H <sub>27</sub> O <sub>8</sub> N <sub>4</sub> ] <sup>+</sup>  |
|                 | 302.1339                     | Peptide fragment                                                                                           | Peptide   | [C <sub>12</sub> H <sub>20</sub> O <sub>6</sub> N <sub>3</sub> ] <sup>+</sup>  |
|                 | 262.1392                     | Peptide fragment (Ala-DAP) y <sub>2</sub> ion                                                              | Peptide   | [C <sub>10</sub> H <sub>20</sub> O <sub>5</sub> N <sub>3</sub> ] <sup>+</sup>  |
|                 | 204.0862                     | Intact GlcNAc oxonium ion                                                                                  | Glycan    | [C <sub>8</sub> H <sub>14</sub> O <sub>5</sub> N] <sup>+</sup>                 |
| 461.6985 (++)   | 173.0918                     | HexNAc fragment ion                                                                                        | Glycan    | [C <sub>7</sub> H <sub>11</sub> O <sub>4</sub> N] <sup>+</sup>                 |
|                 | 138.0547                     | Oxonium fragment ion                                                                                       | Glycan    | [C <sub>7</sub> H <sub>8</sub> O <sub>2</sub> N] <sup>+</sup>                  |
|                 | 126.0549                     | Oxonium fragment ion                                                                                       | Glycan    | [C <sub>6</sub> H <sub>8</sub> O <sub>2</sub> N] <sup>+</sup>                  |
|                 | 239.1021, 329.1336, 630.2602 | Consistent with fragment ions (MS/MS) from TCT peptidoglycan homologue in <i>Neisseria gonorrhoeae</i> (2) | N/Ap      | Not defined                                                                    |

**Supplement S7.** ACT AQUA peptide dose linearity with linear (solid line) and quadratic (dotted line) fits from 1 to 100 fmol on-column.

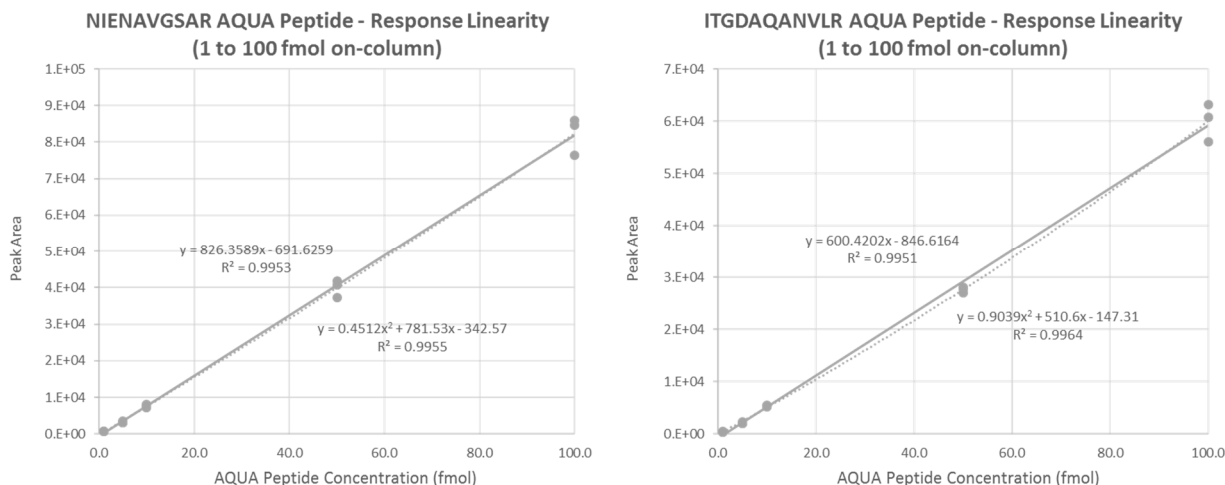

**Supplement S8.** External TCT calibration curves using the singly and doubly charged fragment ion transitions (922.40 > 719.31 and 461.70 > 719.31) for MRM analysis.

**a) Linear – 5.31 to 531 pg**

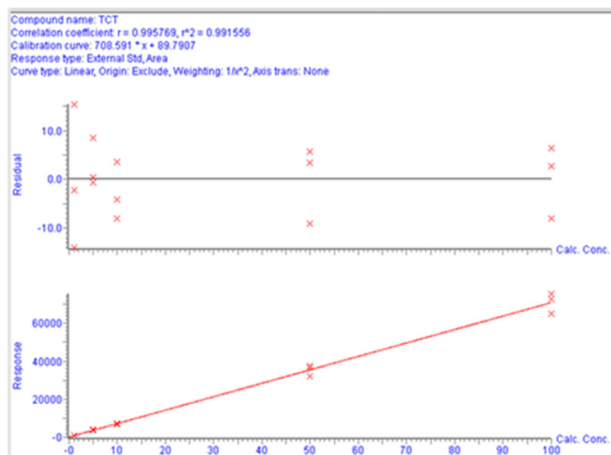

**b) Quadratic – 5.31 to 531 pg**

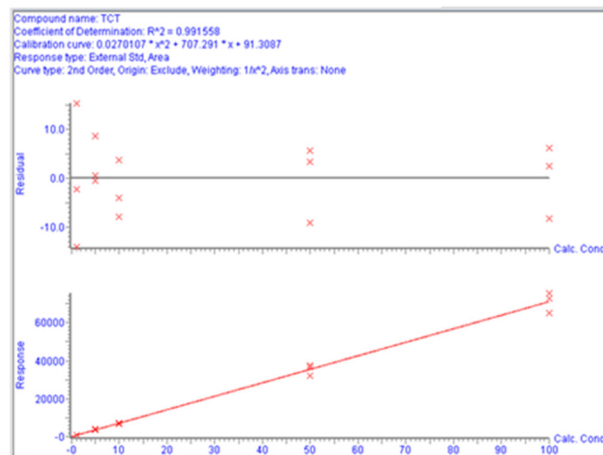

**c) Linear – 5.31 to 5310 pg**

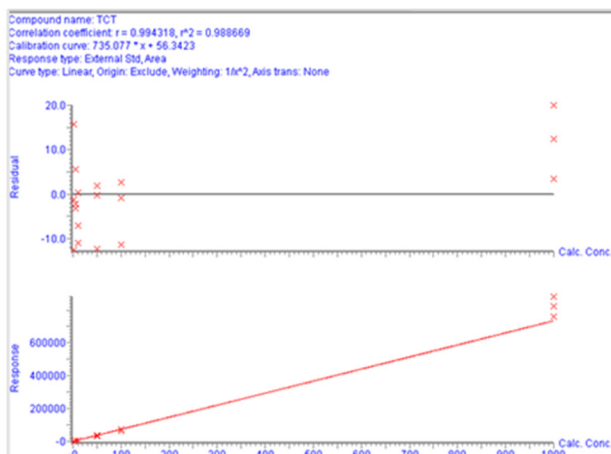

**d) Quadratic – 5.31 to 5310 pg**

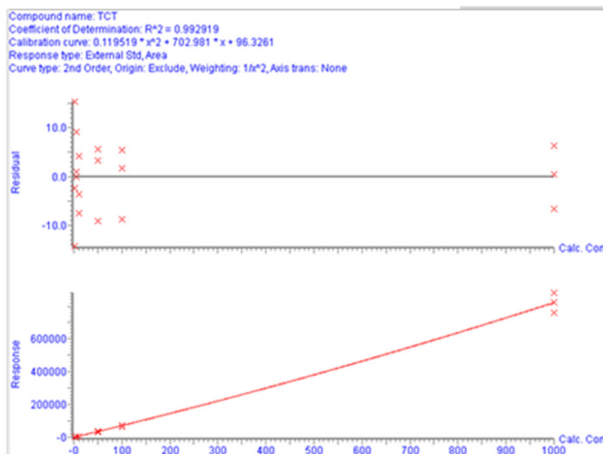

**Supplement S9.** TCT signal response from a multi-sample external calibration curve analyzed by MRM. Signal response from 922.40 > 719.31 and 461.70 > 719.31 transitions denoted by TCT 1+ and TCT 2+, respectively.

| <b>TCT (pg)</b> | <b>TCT 1+</b>                  |             | <b>TCT 2+</b>                  |             | <b>TCT 1+ &amp; TCT 2+</b>     |             | <b>Ratio of TCT 2+ / TCT 1+</b> |              |
|-----------------|--------------------------------|-------------|--------------------------------|-------------|--------------------------------|-------------|---------------------------------|--------------|
|                 | <b>Average Peak Area (n=3)</b> | <b>% CV</b> | <b>Average Peak Area (n=3)</b> | <b>% CV</b> | <b>Average Peak Area (n=3)</b> | <b>% CV</b> | <b>Average Ratio</b>            | <b>% CV</b>  |
| <b>5.31</b>     | 1.91E+02                       | 13.9%       | 5.98E+02                       | 14.5%       | 7.89E+02                       | 13.8%       | 3.14                            | <b>10.2%</b> |
| <b>26.6</b>     | 9.45E+02                       | 17.9%       | 2.79E+03                       | 8.3%        | 3.74E+03                       | 4.7%        | 3.04                            | <b>24.6%</b> |
| <b>53.1</b>     | 1.72E+03                       | 4.3%        | 5.26E+03                       | 8.7%        | 6.98E+03                       | 6.1%        | 3.07                            | <b>11.1%</b> |
| <b>266</b>      | 8.74E+03                       | 3.7%        | 2.68E+04                       | 11.8%       | 3.55E+04                       | 8.0%        | 3.07                            | <b>15.1%</b> |
| <b>531</b>      | 1.70E+04                       | 1.4%        | 5.42E+04                       | 9.5%        | 7.12E+04                       | 7.5%        | 3.19                            | <b>8.6%</b>  |
| <b>5314</b>     | 2.85E+05                       | 5.8%        | 5.38E+05                       | 8.6%        | 8.23E+05                       | 7.4%        | 1.88                            | <b>5.0%</b>  |

## References

1. Scott KB, Turko IV, Phinney KW. Chapter Eleven - QconCAT: Internal Standard for Protein Quantification. In *Kelman Z, editor. Methods in Enzymology [Internet]*. Academic Press; 2016 [cited 2020 Mar 27]. p. 289–303. (Isotope Labeling of Biomolecules—Applications; vol. 566).
2. Martin SA, Rosenthal RS, Biemann K. Fast atom bombardment mass spectrometry and tandem mass spectrometry of biologically active peptidoglycan monomers from *Neisseria gonorrhoeae*. *J. Biol. Chem.* **1987**;262, 7514–7522.
